# Supplementary material
Source: publisher site journal article supplement (https://www.dovepress.com/article/508816)
Supplement: Supplementary file 1 [file get_supplementary_file.php]

**Appendix I Search strings**

Pubmed - ("Self-Management"[Mesh] OR "Self-Management"[tiab] OR "Self Management"[tiab] OR "self care"[tiab] OR "self monitoring"[tiab] OR "self control"[tiab] OR "self examination"[tiab]) AND ("Chronic Disease"[Mesh] OR "Chronic Diseas*"[tiab] OR "Chronic Pain"[Mesh] OR "Chronic Pain"[tiab] OR "chronic illness*"[tiab] OR "chronic illness"[tiab] OR "obesity"[tiab] OR "overweight"[tiab] OR "obese"[tiab]) AND ("qualitative analysis"[tiab] OR "qualitative research"[tiab] OR "unstructured interview"[tiab] OR "semi structured interview"[tiab] OR "grounded theory"[tiab] OR "ethnography"[tiab] OR "phenomenology"[tiab] OR "life history"[tiab] OR "participant observation"[tiab] OR "thematic analysis"[tiab] OR "content analysis"[tiab] OR "constant comparative method"[tiab] OR "field study"[tiab] OR "multimethodolog*"[tiab] OR "mixed method*"[tiab] OR "semi structured"[tiab] OR "focus group*"[tiab] OR "ethnograph*"[tiab] OR "etnograf*"[tiab] OR "ethnograf*"[tiab] OR "phenomenolog*"[tiab] OR "hermeneutic*"[tiab]) AND ("need*"[tiab] OR "needs*"[tiab] OR "Needs Assessment"[Mesh] OR "needs assessment"[tiab] OR "needs and preferences"[tiab] OR "preference*"[tiab] OR "expectations"[tiab] OR "patient expectations"[tiab] OR "support need*"[tiab] OR "self management support"[tiab] OR "self-management support"[tiab] OR "patient support"[tiab])

Cinahl - ("Self-Management" OR "Self-Management" OR "Self Management" OR "self care" OR "self monitoring" OR "self control" OR "self examination") AND ("Chronic Disease" OR "Chronic Diseas*" OR "Chronic Pain" OR "chronic illness*" OR "chronic illness" OR "obesity" OR "overweight" OR "obese") AND ("qualitative analysis" OR "qualitative research" OR "unstructured interview" OR "semi structured interview" OR "grounded theory" OR "ethnography" OR "phenomenology" OR "life history" OR "participant observation" OR "thematic analysis" OR "content analysis" OR "constant comparative method" OR "field study" OR "multimethodolog*" OR "mixed method*" OR "semi structured" OR "focus group*" OR "ethnograph*" OR "etnograf*" OR "ethnograf*" OR "phenomenolog*" OR "hermeneutic*") AND ("need*" OR "needs*" OR "Needs Assessment" OR "needs assessment" OR "needs and preferences" OR "preference*" OR "expectations" OR "patient expectations" OR "support need*" OR "self management support" OR "self-management support" OR "patient support") AND ("review" OR "systematic review" OR "narrative review" OR "literature review")

Cochrane - ("Self-Management" OR "Self-Management" OR "Self Management" OR "self care" OR "self monitoring" OR "self control" OR "self examination") AND ("Chronic Disease" OR "Chronic Diseas*" OR "Chronic Pain" OR "chronic illness*" OR "chronic illness" OR "obesity" OR "overweight" OR "obese") AND ("qualitative analysis" OR "qualitative research" OR "unstructured interview" OR "semi structured interview" OR "grounded theory" OR "ethnography" OR "phenomenology" OR "life history" OR "participant observation" OR "thematic analysis" OR "content analysis" OR "constant comparative method" OR "field study" OR "multimethodolog*" OR "mixed method*" OR "semi structured" OR "focus group*" OR "ethnograph*" OR "etnograf*" OR "ethnograf*" OR "phenomenolog*" OR "hermeneutic*") AND ("need*" OR "needs*" OR "Needs Assessment" OR "needs assessment" OR "needs and preferences" OR "preference*" OR "expectations" OR "patient expectations" OR "support need*" OR "self management support" OR "self-management support" OR "patient support") AND ("review" OR "systematic review" OR "narrative review" OR "literature review")

**Appendix II Interview guides focus group with people with lipoedema**

Introduction

- Welcome and thank the participants for joining.
- Set ground rules and explain the structure of the session.
- Introduce the concept of self-management

Opening question:

- How do you take care of your lipoedema and your health?

Understanding current practices

- What do you do when your complaints get worse or when you’re having a bad day?
- Who gives you advice or helps you?

Needs

- What do you need to take care of your lipoedema?
- Is there anything missing that would help you take care of your lipoedema?

Barriers

- What makes it hard for you to cake care of your lipoedema?

Facilitators

- What helps you take care of your lipoedema?
- What would make it easier for you to manage your lipoedema?

Conclusion

- Summarize key points discussed.
- Thank the participants for their time and input.

**Appendix III Interview guide focus group with healthcare professionals**Introduction

- Welcome and thank the participants for joining.
- Set ground rules and explain the structure of the session.
- Explain the concept of self-management and self-management support:

Opening question:

- Can you tell us about your experience and your role in caring for people with lipoedema?

Understanding Current Practices

- How do you apply self-management support in the treatment of people with lipedema?
- What factors determine any variation in this support?
- How do you help patients with lipedema gain more confidence in managing their condition?
- How do you build communication and relationships with your patients?
- How do you inform your patients with lipedema?
- How do you test whether the knowledge is adequately received or correctly interpreted?
- How do you currently ensure the monitoring/implementation over time?
- What important topics or skills do you emphasize during contact with patients?

Needs

- What do you need to support self-management for people with lipoedema?
- What kind of support do you think is necessary to help patients manage their lipoedema?

Barriers

- What difficulties have you encountered in supporting people with lipoedema manage their condition?

Facilitators

- What makes it easier for you to help people manage their lipoedema?

Conclusion

- Is there anything else you’d like to share about your experience in supporting self-management for patients with lipoedema?
- Thank the participants for their time and input.
